# Supplementary material for: Challenging Endocrine Sensitivity of Hormone Receptor-Positive/HER2-Negative Advanced Breast Cancer with the Combination of Eribulin and Endocrine Therapy: The REVERT Study
Source: Cancers (Basel). 2022 Nov 29;14(23):5880. doi: 10.3390/cancers14235880 (PMC9737152; doi:10.3390/cancers14235880)
Supplement: Supplementary file 1 [file cancers-14-05880-s001.zip › cancers-2052410-supplementary.pdf]

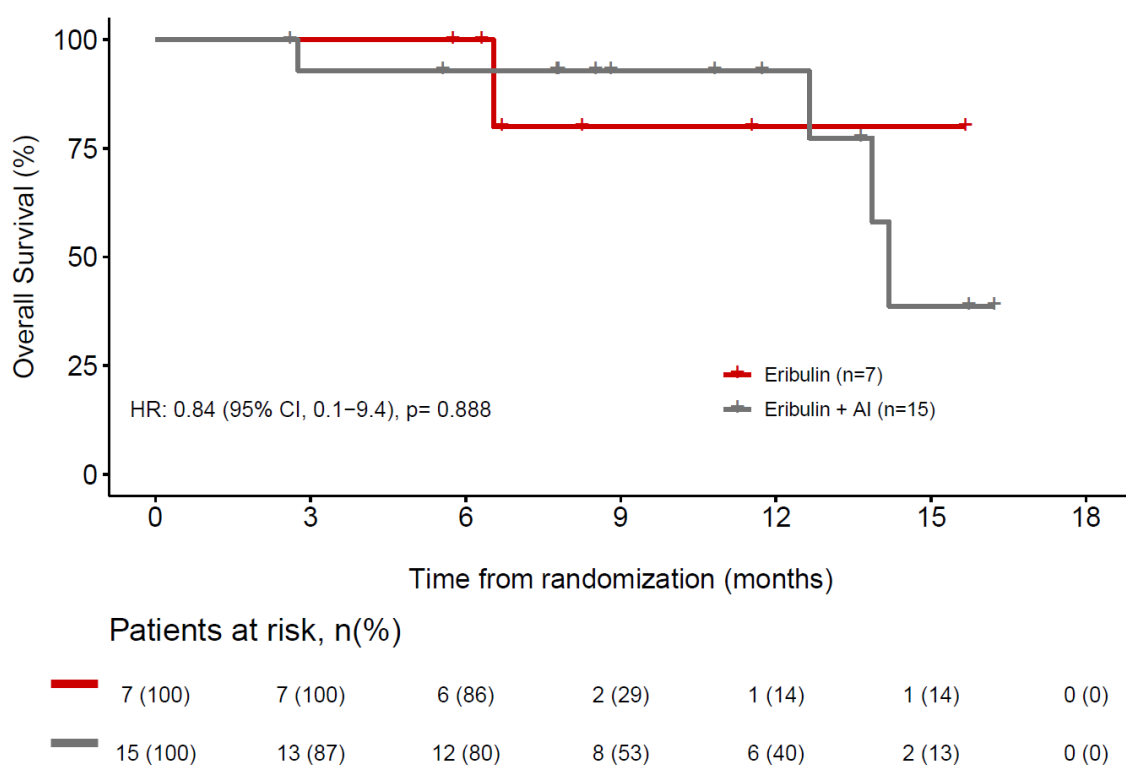

**Supplementary Figure S1.** Overall survival by treatment arm. 95% CI, 95% confidence interval; AI, Aromatase inhibitor; HR, Hazard ratio.
